# Supplementary material for: Establishment and application of a loop-mediated isothermal amplification (LAMP) system for detection of cry1Ac transgenic sugarcane
Source: PubMed Central journal article supplement (PMC4014978; doi:10.1038/srep04912), 2014-05-09
Supplement: srep04912-s1.pdf [file srep04912-s1.pdf]

# Establishment and application of a loop-mediated isothermal amplification (LAMP) system for detection of *cryIAc* transgenic sugarcane

Dinggang Zhou<sup>1</sup>, Jinlong Guo<sup>1</sup>, Liping Xu<sup>1\*</sup>, Shiwu Gao<sup>1</sup>, Qingliang Lin<sup>1</sup>, Qibin Wu<sup>1</sup>, Luguang Wu<sup>2</sup>, Youxiong Que<sup>1\*</sup>

<sup>1</sup>Key Laboratory of Sugarcane Biology and Genetic Breeding, Fujian Agriculture and Forestry University, Ministry of Agriculture, Fuzhou 350002, China

<sup>2</sup>School of Agriculture and Food Sciences, The University of Queensland, Brisbane 4072, Australia.

\*Corresponding authors. E-mail: [xlpmail@126.com](mailto:xlpmail@126.com), [queyouxiong@hotmail.com](mailto:queyouxiong@hotmail.com)

## Figure legends

**Fig S1. Agarose gel electrophoresis of the plasmid 1Ac0229 PCR products.** Lane M: 100 bp DNA ladder. Lanes 1 and 4: ddH<sub>2</sub>O (blank control). Lanes 2 and 5: PG0229 PCR products (negative control). Lanes 3 and 6: the plasmid 1Ac0229 PCR products. Lanes 1-3: primers *cryIAc*-3F and *cryIAc*-3R. Lanes 4-6: primers F3 and B3.

**Fig S2. Effects of 0.80 M betaine on the LAMP reaction.** Tubes 1-4: betaine free. Tubes 5-8: 0.80 M betaine. Tubes 1 and 5: ddH<sub>2</sub>O. Tubes 2 and 6: FN95-1702 (negative control). Tubes 3, 4, 7 and 8: the plasmid 1Ac0229.

**Fig S3. The amplification curves and standard curves obtained in quantitative TaqMan real-time PCR based on the primer pair of *cryIAc*.** In the performed quantitative TaqMan real-time PCR assays, the standard curve formula is  $y = -3.140x + 43.622$ , coefficient of determination ( $R^2 = 0.998$ ) and amplification efficiency ( $E = 1.082$ ).

**Fig S4. LAMP primers and their positions in *cryIAc* gene sequence.**

## Figures

Figure S1

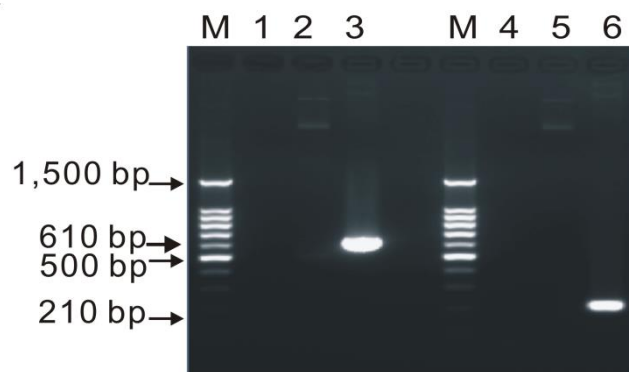

Figure S2

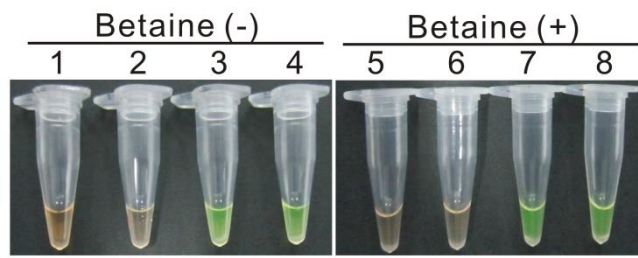

Figure S3

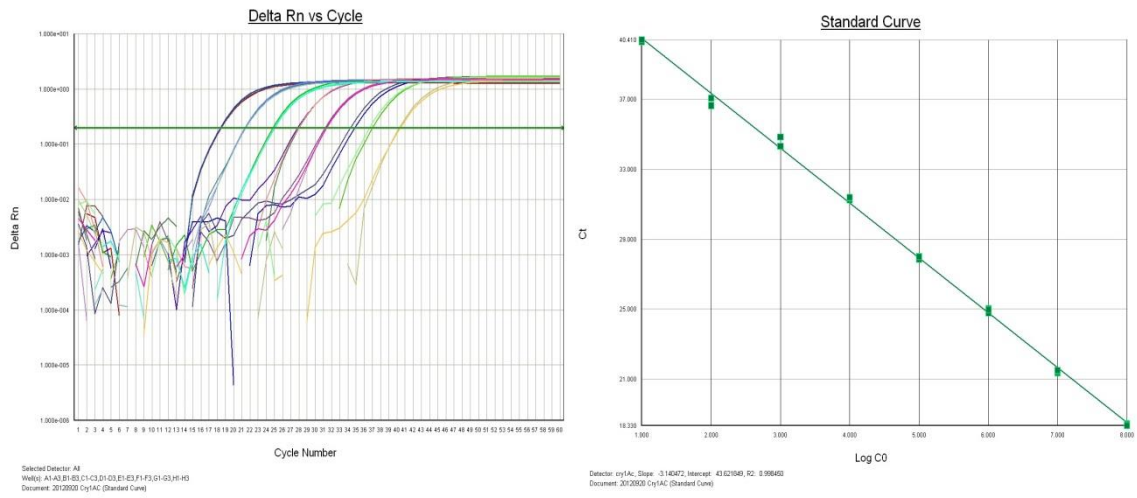

Figure S4

301 AGGTTGGAAG GATTGAGCAA TCTCTACCAA ATCTATGCAG AGAGCTTCAG<sup>→</sup>  
351 AGAGTGGGAA GCCGATCCTA CTAACCCAGC TCTCCCGGAG GAAATGCGTA  
401 TTCAATTCAA CGACATGAAC AGCGCCTTGA CCACAGCTAT CCCATTGTTC  
451 GCAGTCCAGA ACTACCAAGT TCCTCTCTTG TCCGTGTACG TTCAAGCAGC<sup>→</sup>  
501 TAATCTTCAC CTCAGCGTGC TTCGAGACGT TAGCGTGTTT GGGCAAAGGT<sup>←</sup>  
551 GGGGATTCGA TGCTGCAACC ATCAATAGCC GTTACAACGG CCTTACTAGG<sup>←</sup>

## Supplementary Tables

Table S1. Estimation of copy number of *cryIAc* gene in transgenic sugarcane in quantitative TaqMan real-time PCR.

Table S2. Cry1Ac protein content in putative *cryIAc* transgenic sugarcane by quantitative ELISA detection.

Table S3. The sequence information of LAMP primers used in this experiment.

### Tables

Table S1

| Lines | Copy number of <i>cryIAc</i> in single cell (Mean $\pm$ SD) |
|-------|-------------------------------------------------------------|
| 19a-1 | 21.89 $\pm$ 0.68 c                                          |
| 19a-3 | 28.84 $\pm$ 4.45 cd                                         |
| 19a-5 | 21.82 $\pm$ 4.74 c                                          |
| 19b-4 | 8.98 $\pm$ 0.55 b                                           |
| 16K-1 | 75.10 $\pm$ 1.47 g                                          |
| 16k-3 | 31.80 $\pm$ 1.89 d                                          |
| 16k-5 | 9.32 $\pm$ 1.44 b                                           |
| 16d-1 | 110.49 $\pm$ 1.32 h                                         |
| 16d-2 | 60.30 $\pm$ 3.56 f                                          |
| 16d-4 | 128.14 $\pm$ 3.20 i                                         |
| 16d-6 | 46.22 $\pm$ 2.96 e                                          |
| 20i-2 | 57.73 $\pm$ 3.26 f                                          |
| 20i-4 | 134.77 $\pm$ 9.12 j                                         |
| A-2   | -                                                           |
| A-5   | -                                                           |
| B-2   | 1.26 $\pm$ 0.09 a                                           |
| B-5   | -                                                           |

Notes: “—” means undetected; values in the column followed by the same letters means no significant at P=0.05 level.

**Table S2**

| <b>Lines</b> | <b>Cry1Ac protein/ ng g<sup>-1</sup> Leaf (Mean ±SD)</b> |
|--------------|----------------------------------------------------------|
| FN95-1702    | 0.00±0.09 e                                              |
| 19a-1        | 445.79±0.26 c                                            |
| 19a-3        | 547.45±0.10 a                                            |
| 19a-5        | 501.78±0.44 b                                            |
| 19b-4        | 42.18±0.36 d                                             |
| ROC22        | 0.00±0.05 o                                              |
| 16K-1        | 16.87±0.02 l                                             |
| 16k-3        | 24.23±0.21 k                                             |
| 16k-5        | 113.42±0.42 f                                            |
| 16d-1        | 102.56±0.08 g                                            |
| 16d-2        | 87.04±0.61 i                                             |
| 16d-4        | 67.30±0.49 j                                             |
| 16d-6        | 3.86±0.17 n                                              |
| 20i-2        | 90.99±0.28 h                                             |
| 20i-4        | 6.10±0.09 m                                              |
| GT96-44      | 0.00±0.33 p                                              |
| A-2          | 0.36±0.33 p                                              |
| A-5          | 0.18±0.33 p                                              |
| GT94-119     | 0.00±0.33 r                                              |
| B-2          | 19.65±0.36 q                                             |
| B-5          | 0.18±0.33 r                                              |

Notes: the same letter means no significant at P=0.05 level to its corresponding negative control (FN95-1702, ROC22, GT96-44 and GT94-119).

**Table S3**

| <b>Primer</b> | <b>Position</b> | <b>Primer's sequences(5'- 3')</b> |
|---------------|-----------------|-----------------------------------|
| F3            | 349-366         | AGAGAGTGGGAAGCCGAT                |
| B3            | 542-559         | CGAATCCCCACCTTTGCC                |
| FIP (F1c+F2)  | 407-428         | AGGCGCTGTTTCATGTCGTTGA-           |
|               | 367-386         | CCTACTAACCCAGCTCTCCG              |
| BIP (B1c+B2)  | 479-499         | TGTCCGTGTACGTTCAAGCAG-            |
|               | 522-542         | CCAAACACGCTAACGTCTCGA             |
